# Supplementary material
Source: PubMed Central journal article supplement (PMC4256610)
Supplement: bcp0078-1201-sd1.pdf [file bcp0078-1201-sd1.pdf]

## Supporting information 1.

### PubMed search strategy

Carried out on: 08-07-2013

#### Search: (#1 AND #2) NOT (#3)

##### #1 Patient participation

"Decision Making"[Mesh] OR "Shared decision"[tiab] OR "Shared decisions"[tiab] OR Concordanc\*[tiab] OR "Patient Participation"[Mesh] OR "Patient participation"[tiab] OR "consumer participation"[tiab] OR "Patient interview"[tiab] OR "Patient interviews"[tiab] OR "Patient input"[tiab] OR "Participating patient"[tiab] OR "Participating patients"[tiab] OR "patient contribution"[tiab] OR "patients contribution"[tiab] OR "patient contributions"[tiab] OR "patients contributions"[tiab] OR "Patient involvement"[tiab] OR "Physician-Patient Relations"[Mesh] OR "Professional-Patient Relations"[Mesh] OR "Physician-Patient Relation"[tiab] OR "Physician-Patient Relations"[tiab] OR "Physician-patient communication"[tiab] OR "Patient-Centered Care"[Mesh] OR "Patient-focused care"[tiab] OR "Patient-centered intervention"[tiab] OR "Patient-centred intervention"[tiab] OR "Patient-focused intervention"[tiab] OR "Patient-centered"[tiab] OR "Patient-centred"[tiab] OR "patient centredness"[tiab] OR "Individualized-care"[tiab] OR "person-centered care"[tiab] OR "person-centred care"[tiab] OR "client-centered care"[tiab] OR "client-centred care"[tiab] OR "resident-centered care"[tiab] OR "resident-centred care"[tiab] OR "patient empowerment"[tiab] OR "Home Care Services"[Mesh] OR "Medical Home"[tiab] OR "Medical Homes"[tiab] OR "Home visit"[tiab] OR "Home visits"[tiab] OR "domiciliary care"[tiab] OR "domiciliary pharmaceutical care"[tiab] OR "domiciliary pharmacist visits"[tiab] OR "domiciliary pharmacy visits"[tiab] OR "Patient Information"[tiab] OR "patient counseling"[tiab] OR "patient counselling"[tiab] OR "patient consult"[tiab] OR "patient consults"[tiab] OR "patient communication"[tiab] OR "brown bag"[tiab]

##### #2 Medication review

"Medication review"[tiab] OR "Medication reviews"[tiab] OR "Drug utilization review"[Mesh] OR "Medication Therapy Management"[Mesh] OR "Drug utilization review"[tiab] OR "Drug utilization reviews"[tiab] OR "Drug utilisation review"[tiab] OR "Drug utilisation reviews"[tiab] OR "Drug utilization evaluation"[tiab] OR "Drug utilisation evaluation"[tiab] OR "Drug utilisation evaluations"[tiab] OR "Drug use review"[tiab] OR "Drug use reviews"[tiab] OR "Pharmacist intervention"[tiab] OR "Pharmacist interventions"[tiab] OR "Pharmacists intervention"[tiab] OR "Pharmacists interventions"[tiab] OR "pharmaceutical care programme"[tiab] OR "pharmaceutical care program"[tiab] OR "Medication Reconciliation"[Mesh] OR "Medication reconciliation"[tiab] OR "Medication reconciliations"[tiab] OR "Medication assessment"[tiab] OR "Medication assessments"[tiab] OR "Medication evaluation"[tiab] OR "Medication evaluation"[tiab] OR "Drug assessment"[tiab] OR "Drug assessments"[tiab] OR "Drugs assessment"[tiab] OR "Drug assessments"[tiab] OR "Medicines use review"[tiab] OR "Medicines use reviews"[tiab] OR "Medicine use review"[tiab] OR "Medicine use reviews"[tiab] OR "Medication use review"[tiab] OR "Medication use reviews"[tiab] OR "Medicines utilization review"[tiab] OR "Medicines utilization reviews"[tiab] OR "Medicine utilization review"[tiab] OR "Medicine utilization reviews"[tiab] OR "Medication utilization review"[tiab] OR "Medication utilization reviews"[tiab] OR "Medicines utilisation review"[tiab] OR "Medicines utilisation reviews"[tiab] OR "Medicine utilisation review"[tiab] OR "Medicine utilisation reviews"[tiab] OR "Medication utilisation review"[tiab] OR "Medication utilisation reviews"[tiab] OR "Clinical medication review"[tiab] OR "Clinical medication reviews"[tiab] OR "Treatment review"[tiab] OR "Treatment reviews"[tiab] OR "Prescription review"[tiab] OR "Prescription reviews"[tiab] OR "Medication Errors/prevention and control"[Mesh] OR "Inappropriate Prescribing/prevention and control"[Mesh] OR "Pharmacotherapy consultation"[tiab] OR "Pharmacotherapy consultations"[tiab] OR "Medication consultation"[tiab] OR "Medication consultations"[tiab] OR "Medications consultation"[tiab] OR "Medications consultations"[tiab] OR "Medicine consultation"[tiab] OR "Medicine consultations"[tiab] OR "Medicines consultation"[tiab] OR "Medicines consultations"[tiab] OR "Drug consultation"[tiab] OR "Drug consultations"[tiab] OR "medication analysis"[tiab] OR "medication analyses"[tiab] OR "medication management"[tiab] OR "medicine management"[tiab] OR "medicines management" [tiab]

##### #3 Publication Types (NOT)

("addresses"[Publication Type] OR "biography"[Publication Type] OR "comment"[Publication Type] OR "directory"[Publication Type] OR "editorial"[Publication Type] OR "festschrift"[Publication Type] OR "interview"[Publication Type] OR "lectures"[Publication Type] OR "legal cases"[Publication Type] OR "legislation"[Publication Type] OR "letter"[Publication Type] OR "news"[Publication Type] OR "newspaper article"[Publication Type] OR "patient education handout"[Publication Type] OR "popular works"[Publication Type] OR "congresses"[Publication Type] OR "consensus development conference"[Publication Type] OR "consensus development conference, nih"[Publication Type] OR "practice guideline"[Publication Type]) NOT ("animals"[MeSH Terms] NOT "humans"[MeSH Terms])
